# Supplementary material for: Quality of Anticoagulation with Warfarin in Korean Patients with Atrial Fibrillation and Prior Stroke: A Multicenter Retrospective Observational Study
Source: PubMed Central journal article supplement — J Clin Neurol. 2016 Jun 30;13(3):273–80. doi: 10.3988/jcn.2017.13.3.273 (PMC5532324; doi:10.3988/jcn.2017.13.3.273), 2016-06-30
Supplement: jcn-13-273-s001.pdf [file jcn-13-273-s001.pdf]

**Supplementary Table 1.** Demographics and baseline characteristics of the warfarin-initiated cohort

| Variable                                                                                | Warfarin-initiated cohort (n=1,814) |
|-----------------------------------------------------------------------------------------|-------------------------------------|
| Age (years), mean (SD)                                                                  | 71.3 (9.8)                          |
| <65                                                                                     | 388 (21.4)                          |
| 65–74                                                                                   | 715 (39.4)                          |
| ≥75                                                                                     | 711 (39.2)                          |
| Female                                                                                  | 821 (45.3)                          |
| Height (cm), mean (SD)                                                                  | 162.1 (8.94)                        |
| Weight (kg), mean (SD)                                                                  | 62.2 (11.4)                         |
| NIHSS score*                                                                            |                                     |
| Mean (SD)                                                                               | 7.1 (6.6)                           |
| Median (IQR)                                                                            | 5.0 (2.0–11.0)                      |
| <8                                                                                      | 1,130 (62.7)                        |
| 8–16                                                                                    | 457 (25.4)                          |
| >16                                                                                     | 215 (11.9)                          |
| Creatinine (mg/dL), mean (SD)                                                           | 1.03 (0.67)                         |
| CHADS <sub>2</sub> score, mean (SD)                                                     | 3.46 (0.96)                         |
| CHA <sub>2</sub> DS <sub>2</sub> -VASc score, mean (SD)                                 | 4.88 (1.42)                         |
| Congestive heart failure                                                                | 216 (11.9)                          |
| Hypertension                                                                            | 1,242 (68.5)                        |
| Diabetes mellitus                                                                       | 477 (26.3)                          |
| Stroke/TIA                                                                              | 1,814 (100.0)                       |
| Vascular disease                                                                        | 324 (17.9)                          |
| Total number of INR measurements included in TTR analysis                               | 42,634                              |
| INR measurements included in TTR analysis per patient, mean (SD)                        | 23.6 (20.7)                         |
| Total duration included in TTR analysis (month)                                         | 29,512                              |
| Duration included in TTR analysis per patient (month), mean (SD)                        | 16.4 (14.3)                         |
| Interval between consecutive INR measurements included in TTR analysis (day), mean (SD) | 16.5 (13.2)                         |

Values are n (%) otherwise indicated.

\*NIHSS score, not available in 12 patients.

INR: international normalized ratio, IQR: interquartile range, NIHSS: National Institutes of Health Stroke Scale, TTR: time in therapeutic range.
