# Supplementary material for: Quality of Anticoagulation with Warfarin in Korean Patients with Atrial Fibrillation and Prior Stroke: A Multicenter Retrospective Observational Study
Source: PubMed Central journal article supplement — J Clin Neurol. 2016 Jun 30;13(3):273–80. doi: 10.3988/jcn.2017.13.3.273 (PMC5532324; doi:10.3988/jcn.2017.13.3.273), 2016-06-30
Supplement: jcn-13-273-s002.pdf [file jcn-13-273-s002.pdf]

**Supplementary Table 2.** TTR and INR included in TTR analysis

| <b>Warfarin-initiated cohort (n=1,814)</b> |                  |
|--------------------------------------------|------------------|
| Mean TTR (95% CI)                          | 47.3 (46.2–48.3) |
| TTR quartiles (%)                          |                  |
| 1st quartile                               | <30.8            |
| 2nd quartile                               | 30.8–46.8        |
| 3rd quartile                               | 46.8–63.2        |
| 4th quartile                               | >63.2            |
| Mean INR (SD)                              | 2.24 (0.88)      |
| INR 2.0–3.0 (%)                            | 44.6             |
| INR range proportion (%)                   |                  |
| <1.50                                      | 16.7             |
| 1.50–1.99                                  | 25.1             |
| 2.00–2.49                                  | 27.8             |
| 2.50–3.00                                  | 16.9             |
| 3.01–3.50                                  | 7.3              |
| 3.51–4.00                                  | 3.1              |
| >4.00                                      | 3.2              |

INR: international normalized ratio, TTR: time in therapeutic range.
