# Supplementary material for: Quality of Anticoagulation with Warfarin in Korean Patients with Atrial Fibrillation and Prior Stroke: A Multicenter Retrospective Observational Study
Source: PubMed Central journal article supplement — J Clin Neurol. 2016 Jun 30;13(3):273–80. doi: 10.3988/jcn.2017.13.3.273 (PMC5532324; doi:10.3988/jcn.2017.13.3.273), 2016-06-30
Supplement: jcn-13-273-s003.pdf [file jcn-13-273-s003.pdf]

**Supplementary Table 3.** TTR and INR 2.0–3.0 proportion included in TTR analysis of the warfarin-initiated cohort by each center

| Center  | No.   | Mean TTR (95% CI) | INR 2–3 (%) |
|---------|-------|-------------------|-------------|
| 1       | 120   | 53.0 (49.6–56.4)  | 46.0        |
| 2       | 152   | 48.1 (44.4–51.8)  | 45.1        |
| 3       | 100   | 48.8 (44.5–53.1)  | 40.0        |
| 4       | 84    | 38.3 (33.7–43.0)  | 35.4        |
| 5       | 154   | 57.3 (53.8–60.7)  | 52.4        |
| 6       | 93    | 44.8 (40.2–49.5)  | 46.0        |
| 7       | 44    | 42.2 (37.0–47.3)  | 39.8        |
| 8       | 87    | 35.2 (31.3–39.1)  | 37.3        |
| 9       | 68    | 48.6 (43.9–53.4)  | 44.8        |
| 10      | 67    | 45.4 (40.0–50.9)  | 43.6        |
| 11      | 142   | 56.4 (52.9–60.0)  | 53.8        |
| 12      | 66    | 52.3 (46.0–58.7)  | 49.7        |
| 13      | 188   | 39.5 (36.6–42.4)  | 36.7        |
| 14      | 176   | 52.2 (49.0–55.5)  | 50.6        |
| 15      | 145   | 35.5 (31.4–39.7)  | 37.6        |
| 16      | 128   | 50.6 (46.5–54.7)  | 43.7        |
| Overall | 1,814 | 47.3 (46.2–48.3)  | 44.6        |

INR: international normalized ratio, TTR: time in therapeutic range.
